# Supplementary material for: Genetic Spatiotemporal Anatomy of Plasmodium vivax Malaria Episodes in Greece, 2009–2013
Source: PubMed Central journal article supplement (PMC5823331; doi:10.3201/eid2403.170605), 2018-03
Supplement: 17-0605-Techapp-s2.pdf [file 17-0605-Techapp-s2.pdf]

# Genetic Spatiotemporal Anatomy of *Plasmodium vivax* Malaria Episodes in Greece, 2009–2013

## Technical Appendix 2

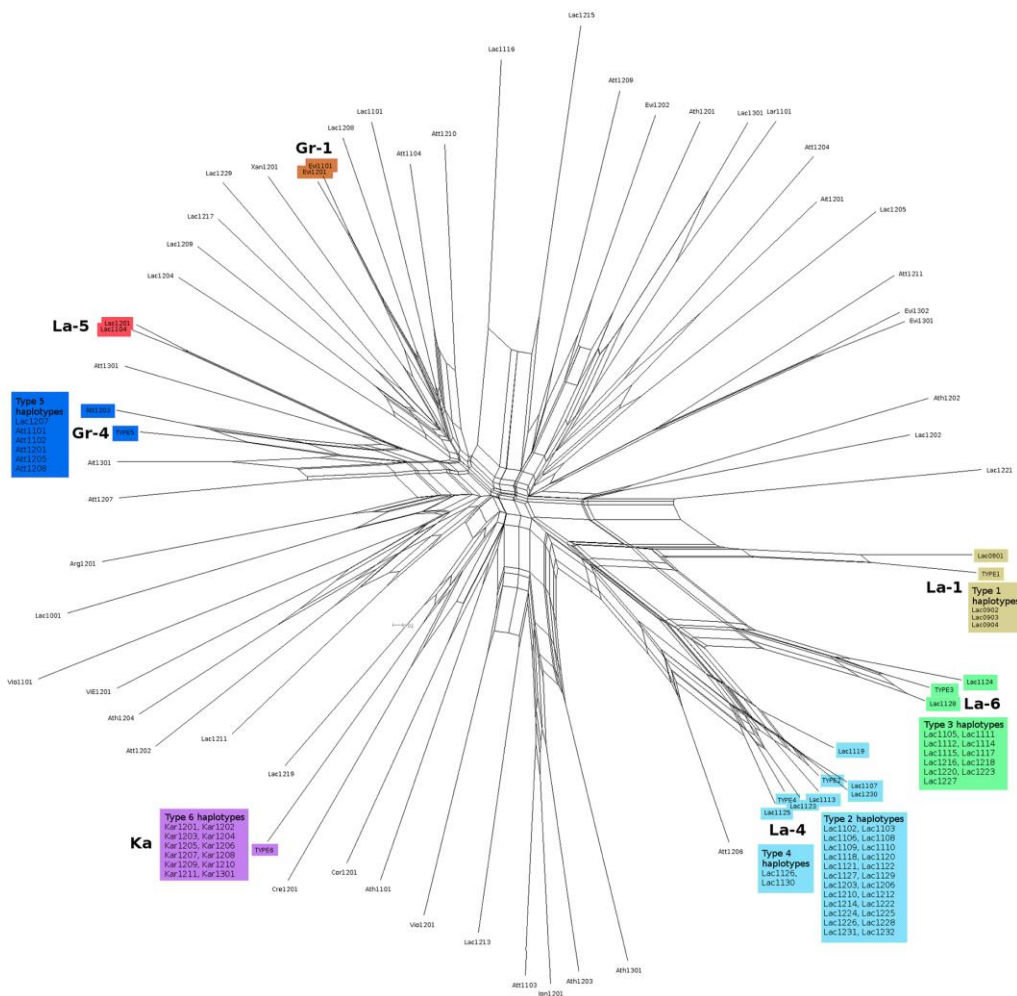

**Technical Appendix Figure 1.** Network phylogenetic analysis of the *Plasmodium vivax* isolates, Greece, 2009–2013. The haplotype families are highlighted with different colors. Detailed description of the haplotypes is provided in online Technical Appendix 1 Tables 1–3 (<https://wwwnc.cdc.gov/EID/article/24/3/17-0605-Techapp1.xlsx>).

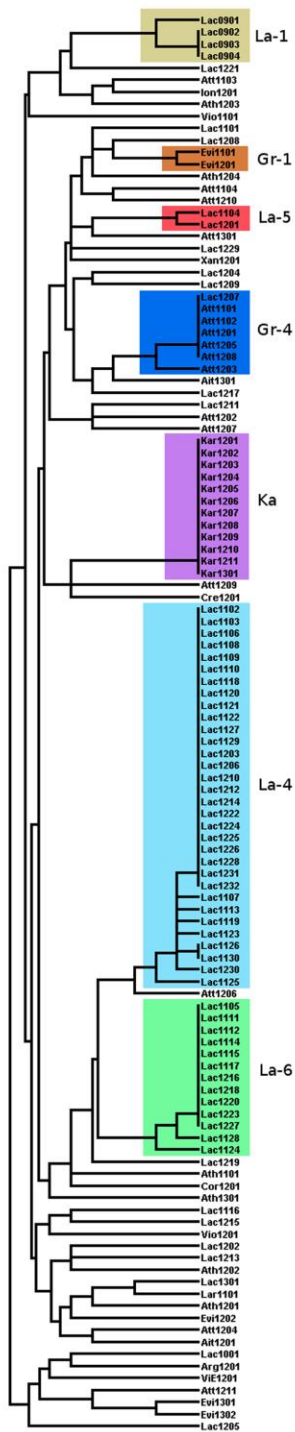

**Technical Appendix Figure 2.** Phylogenetic tree of the *Plasmodium vivax* isolates, Greece, 2009–2013. The haplotype families are highlighted with different colors. Detailed description of the haplotypes is provided in the online Technical Appendix 1 Tables 1–3 (<https://wwwnc.cdc.gov/EID/article/24/3/17-0605-Techapp1.xlsx>).
